# Supplementary material for: Form-controlled synthesis of a polymorphic nonlinear optical crystal CsMgPO4·6H2O
Source: Royal Society of Chemistry journal article supplement (doi:10.1039/d4ce00594e), 2024-01-01
Supplement: d4ce00594e1.pdf [file d4ce00594e1.pdf]

## Supporting Information

### Form-controlled synthesis of polymorphic nonlinear optical crystal $\text{CsMgPO}_4 \cdot 6\text{H}_2\text{O}$

Sheng Lv, Liangcheng Song\*, Yanling Xu, Hongyan Cui, Haoyu Cheng, Zhihao Wang, Chongqiang Zhu, Chunhui Yang

School of Chemistry and Chemical Engineering, Harbin Institute of Technology, Harbin 150001, People's Republic of China

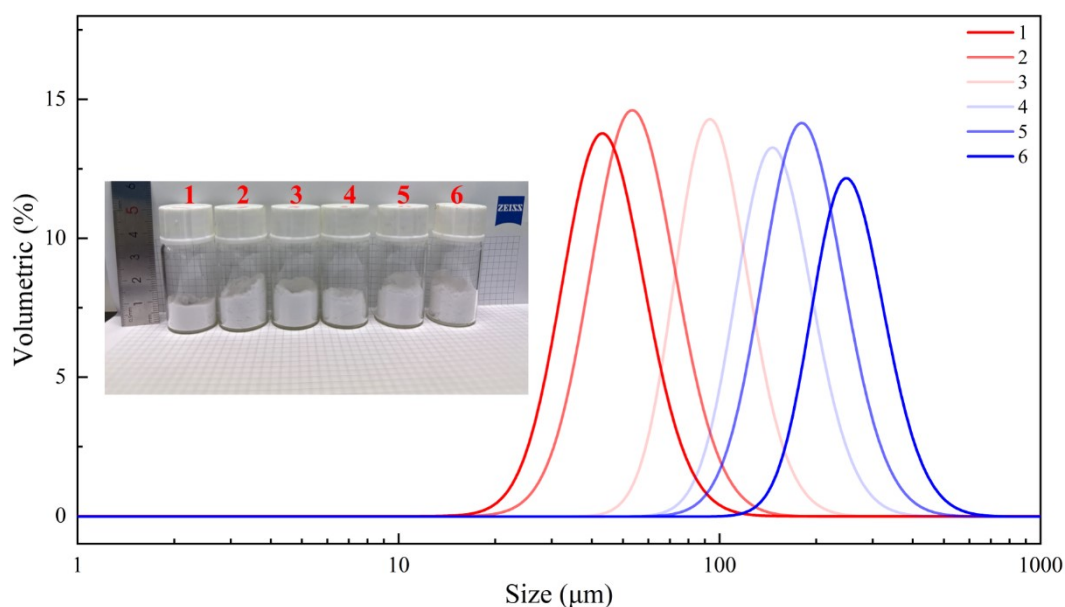

Figure S. The picture and the particle size distributions of the samples collected by test sieves: Sample 1 between 290 mesh and 400 mesh; Sample 2 between 200 mesh and 290 mesh; Sample 3 between 140 mesh and 200 mesh; Sample 4 sieved between 100 mesh and 140 mesh; Sample 5 sieved between 70 mesh and 100 mesh and Sample 6 sieved between 50 mesh and 70 mesh.

---

\* To whom correspondence should be addressed.

E-mail: [lcsong@hit.edu.cn](mailto:lcsong@hit.edu.cn); Phone: +86-451-86403829; Fax: +86-451-86418270.
